# Supplementary material for: Post-traumatic stress disorder symptom burden and gender each affect generalization in a reward- and punishment-learning task
Source: PLoS One. 2017 Feb 14;12(2):e0172144. doi: 10.1371/journal.pone.0172144 (PMC5308829; doi:10.1371/journal.pone.0172144)
Supplement: S1 File — Values of the means and standard errors used to construct data figures. (XLSX) [file pone.0172144.s001.xlsx]

## Sheet: Figure 3AEF
% Correct	pos1	pos2	pos3	pos4	neg1	neg2	neg3	neg4
n	128	128	128	128	128	128	128	128
mean	74.9023	74.8047	77.832	83.3008	48.1445	71.6797	79.7852	80.0781
sd	24.5278	27.4393	27.4944	22.9621	21.456	25.607	26.7185	28.9003
serr	2.16797	2.42531	2.43018	2.02958	1.89646	2.26336	2.36161	2.55445
																		PTSS (PTSD SYMPTOMS)	pos4	neg4	PTSS (PTSD SYMPTOMS)	pos4	neg4
																		0	0	100	1	0	87.5
																		0	25	100	1	25	87.5
																		0	37.5	100	1	37.5	25
																		0	50	37.5	1	37.5	86.5
																		0	50	37.5	1	37.5	87.5
																		0	50	100	1	50	37.5
																		0	52	100	1	50	87.5
																		0	48	100	1	50	100
																		0	51	100	1	51	100
																		0	49	100	1	49	100
																		0	62.5	25	1	50	99
																		0	63.5	50	1	62.5	37.5
																		0	61.5	50	1	62.5	50
																		0	62.5	87.5	1	62.5	62.5
																		0	75	25	1	62.5	75
																		0	75	37.5	1	75	12.5
																		0	75	62.5	1	75	25
																		0	75	100	1	75	37.5
																		0	76	100	1	76	37.5
																		0	74	100	1	75	50
																		0	87.5	0	1	75	62.5
																		0	87.5	25	1	75	75
						n=62									n=66			0	87.5	75	1	75	100
																		0	88.5	75	1	76	100
																		0	86.5	75	1	87.5	0
																		0	87.5	76	1	87.5	25
																		0	87.5	96	1	87.5	37.5
																		0	87.5	97	1	87.5	87.5
																		0	87.5	98	1	87.5	100
																		0	87.5	99	1	86.5	100
																		0	88.5	100	1	100	0
																		0	96	96	1	100	25
																		0	96	97	1	100	37.5
																		0	96	98	1	100	50
																		0	96	99	1	100	62.5
																		0	96	100	1	100	87.5
																		0	97	96	1	99	87.5
																		0	97	97	1	100	86.5
																		0	97	98	1	100	88.5
																		0	97	99	1	100	100
																		0	98	96	1	99	100
																		0	98	97	1	98	100
																		0	98	98	1	97	100
																		0	98	99	1	100	99
																		0	98	100	1	100	98
																		0	99	96	1	100	97
																		0	99	97	1	98	98
																		0	99	98	1	97	97
																		0	99	99	1	98	97
																		0	100	0	1	97	98
																		0	100	50	1	96	100
																		0	100	51	1	100	96
																		0	100	52	1	96	96
																		0	100	62.5	1	99	96
																		0	100	74	1	96	99
																		0	100	76	1	96	98
																		0	100	75	1	98	96
																		0	100	87.5	1	97	96
																		0	100	86.5	1	96	97
																		0	100	98	1	95	100
																		0	95	100	1	100	95
																		0	100	95	1	95	99
																					1	99	95
																					1	95	98
																					1	98	95
																					1	95	97

## Sheet: Figure 3BCD
Civilian, noPTSS	pos1	pos2	pos3	pos4	neg1	neg2	neg3	neg4
n	36	36	36	36	36	36	36	36				CIVILIAN
mean	76.0417	73.2639	78.8194	82.9861	46.875	71.875	81.5972	80.5556
sd	22.8299	27.411	26.1895	23.5571	18.75	23.2177	27.3022	29.1922
serr	3.80499	4.5685	4.36491	3.92618	3.125	3.86962	4.55037	4.86536
Civilian, PTSS
n	11	11	11	11	11	11	11	11
mean	78.4091	69.3182	69.3182	78.4091	30.6818	51.1364	51.1364	51.1364
sd	15.901	23.2941	29.7719	20.9843	17.9962	27.0731	35.1135	37.6889
serr	4.79432	7.02343	8.97655	6.327	5.42606	8.16286	10.5871	11.3636
Non-combat, noPTSS
n	19	19	19	19	19	19	19	19
mean	67.7632	76.3158	74.3421	78.9474	46.0526	61.8421	77.6316	77.6316
sd	26.7822	25.9857	20.6129	23.2187	22.8418	30.7526	32.1614	29.0411
serr	6.14427	5.96153	4.72892	5.32674	5.24026	7.05514	7.37834	6.66248
Non-combat, PTSS												NON-COMBAT
n	32	32	32	32	32	32	32	32
mean	72.2656	75.7812	77.3438	84.7656	50.7812	77.7344	83.9844	82.0312
sd	27.4476	28.0296	31.3406	22.1647	18.7668	25.937	20.8766	25.3876
serr	4.8521	4.95499	5.54029	3.9182	3.31753	4.58505	3.69049	4.48794
Combat, noPTSS
n	7	7	7	7	7	7	7	7
mean	87.5	87.5	91.0714	98.2143	50	73.2143	83.9286	96.4286
sd	14.4338	14.4338	15.6696	4.72456	29.756	13.3631	20.0446	9.44911
serr	5.45545	5.45545	5.92254	1.78571	11.2467	5.05076	7.57614	3.57143
Combat, PTSS
n	23	23	23	23	23	23	23	23
mean	77.1739	73.3696	79.8913	83.1522	55.9783	80.4348	85.3261	87.5
sd	26.5572	33.3508	31.0194	26.8118	23.4973	19.8811	17.9378	25
serr	5.53757	6.95413	6.46799	5.59065	4.89953	4.14549	3.74029	5.21286
												COMBAT
total n	128

## Sheet: Figure 4
% "pick"	pctpick1	pctpick2	pctpick3	pctpick4
n	128	128	128	128
mean	63.3789	51.5625	49.0234	51.6113
sd	16.6145	17.4147	17.7374	17.3128
serr	1.46853	1.53926	1.56778	1.53025

## Sheet: Figure 5
% "pick"	PosPos	PosNew	PosNeg	NewPos	NewNew	NewNeg	NegPos	NegNew	NegNeg		PosFore	NewFore	NegFore	PosBack	NewBack	NegBack
n	128	128	128	128	128	128	128	128	128		128	128	128	128	128	128
mean	73.9583	70.5729	62.7604	64.0625	55.9896	44.5313	40.8854	33.8542	23.9583		69.0972	54.8611	32.8993	59.6354	53.4722	43.75
sd	38.5515	37.3255	41.7511	41.7486	40.5417	41.679	42.2911	40.1189	34.9822		29.8383	30.317	30.72	27.8126	25.7766	28.939
serr	3.40751	3.29914	3.69031	3.69009	3.58342	3.68394	3.73804	3.54604	3.09202		2.63736	2.67967	2.71529	2.45831	2.27835	2.55787

## Sheet: Figure 6
noPTSS	PosFore	NewFore	NegFore			PTSS	PosFore	NewFore	NegFore				Male	PosBack	NewBack	NegBack			Female	PosBack	NewBack	NegBack
n	62	62	62			n	66	66	66				n	79	79	79			n	49	49	49
mean	56.9892	53.5842	40.681			mean	62.1212	53.367	46.633				mean	61.8847	52.18	46.2729			mean	56.0091	55.5556	39.6825
sd	26.7276	25.4109	26.4582			sd	28.7754	26.3096	31.0145				sd	27.1981	24.9313	30.4774			sd	28.6851	27.2166	26.0579
serr	3.39441	3.22719	3.36019			serr	3.54201	3.23848	3.81762				serr	3.06003	2.80499	3.42897			serr	4.09787	3.88808	3.72255

## Sheet: Figure 7
Male-noPTSS	PosFore	NewFore	NegFore		Female-noPTSS	PosFore	NewFore	NegFore		Male-noPTSS	PosBack	NewBack	NewBack		Female-noPTSS	PosBack	NewBack	NewBack
n	30	30	30		n	32	32	32		n	30	30	30		n	32	32	32
mean	75.9259	53.3333	24.8148		mean	63.1944	50.6944	34.7222		mean	58.1481	50.7407	45.1852		mean	55.9028	56.25	36.4583
sd	27.2296	31.2095	27.4786		sd	28.2839	31.6715	29.2955		sd	28.0915	22.917	29.3151		sd	25.7866	27.643	23.1413
serr	4.97142	5.69804	5.01688		serr	4.99994	5.59879	5.17875		serr	5.12878	4.18405	5.35217		serr	4.55847	4.88665	4.09084
Male-PTSS					Female-PTSS					Male-PTSS					Female-PTSS
n	49	49	49		n	17	17	17		n	49	49	49		n	17	17	17
mean	70.068	56.2358	37.8685		mean	65.3595	61.4379	29.4118		mean	64.1723	53.0612	46.9388		mean	56.2092	54.2484	45.7516
sd	29.5894	28.8147	32.5461		sd	37.0357	31.7002	32.6176		sd	26.6691	26.2805	31.4487		sd	34.3526	27.1832	30.652
serr	4.22706	4.11639	4.64945		serr	8.98247	7.68843	7.91093		serr	3.80987	3.75436	4.49267		serr	8.33173	6.59289	7.43419
		Positive	New	Negative

## Sheet: Figure 8
Confidence, foreground	Positive	New	Negative						Confidence, background	Positive	New	Negative
n	128	128	128						n	128	128	128
mean	7.90104	6.95833	7.50347						mean	7.53993	7.32899	7.49392
sd	1.99553	1.99401	2.06009						sd	1.8986	1.8726	2.00533
serr	0.176382	0.176247	0.182088						serr	0.167814	0.165516	0.177248
